# Supplementary material
Source: PubMed Central journal article supplement (PMC9660185)

# APPLIED MICROBIOLOGY AND BIOTECHNOLOGY

## SUPPLEMENTARY MATERIAL

### **Immunoprophylactic properties of the *Corynebacterium pseudotuberculosis*-derived MBP:PLD:CP40 fusion protein**

Thiago Doria Barral<sup>1</sup>, Mauricio Alcantara Kalil, Ricardo Barros Mariutti<sup>2</sup>, Raghuvir Krishnaswamy  
Arni<sup>2</sup>,  
Carolina Gismene<sup>2</sup>, Fernanda Severo Sousa<sup>3</sup>, Tiago Collares<sup>3</sup>, Fabiana Kommling Seixas<sup>3</sup>, Sibe  
Borsuk<sup>3</sup>, Alessandra Estrela-Lima<sup>4</sup>, Vasco Azevedo<sup>5</sup>, Roberto Meyer<sup>1</sup>, Ricardo Wagner Portela<sup>1,\*</sup>

<sup>1</sup> Laboratory of Immunology and Molecular Biology, Universidade Federal da Bahia, Salvador, Bahia State, Brazil, 40110-100;

<sup>2</sup> Multiuser Center for Biomolecular Innovation, Universidade Estadual Paulista, São José do Rio Preto, São Paulo State, Brazil, 15054-000;

<sup>3</sup> Center for Technological Development, Universidade Federal de Pelotas, Pelotas, Rio Grande do Sul State, Brazil; 96010-900;

<sup>4</sup> Laboratory of Veterinary Pathology, School of Veterinary Medicine and Zootechnics, Universidade Federal da Bahia, Salvador, Bahia State, Brazil, 40110-100;

<sup>5</sup> Laboratory of Molecular and Cellular Genetics, Universidade Federal de Minas Gerais, Belo Horizonte, Minas Gerais State, Brazil, 31270-901.

\* Corresponding author: Ricardo Wagner Portela, Laboratory of Immunology and Molecular Biology, Universidade Federal da Bahia, Avenida Reitor Miguel Calmon s/n, Salvador, Bahia State, Brazil, 40110-100. E-mail: [rwportela@ufba.br](mailto:rwportela@ufba.br). Telephone (FAX): +55 71 3283-8936.

**Table S1. Amino acid sequence of the MBP:PLD:CP40 fusion protein.** Highlighted: Maltose Binding Protein (grey), the cleavage site for TEV-protease (underlined in red), the PLD protein from *C. pseudotuberculosis* (green), the rigid linker (pink), the CP40 protein from *C. pseudotuberculosis* (blue), and the histidine tag (yellow).

---

**Amino acid sequence**

---

MKIEEGKLVWINGDKGYNGLAEVGGKFEKDTGIKVTVEHPDKLEEKFPQVAATGDG  
PDIIFWAHDRFGGYAQSGLLAEITPDKAFQDKLYPFTWDAVRYNGKLIAYPIAVEALS  
LIYNKDLLPNPPKTWEEIPALDKELKAKGKSALMFNLQEPYFTWPLIAADGGYAFKYE  
NGKYDIKDVGVNAGAKAGLTFLVDLKNKHMNADTDYSIAEAAFNKGETAMTINGP  
WAWSNIDTSKVNYGVTVLPTFKGQPSKPFVGVLSAGINAASPNKELAKEFLENYLLT  
DEGLEAVNKDKPLGAVALKSYEELAKDPRIAATMENAQKGEIMPNIQMSAFWYA  
VRTAVINAASGRQTVDEALKDAQTNSSSNNNNNNNNNNNLGIEGRGGENLYFQSMASP  
ASTANRPVYAIAARVLTQGVDDAVAIGANALEIDFTAWGRGWWADADGIPTSAGA  
TAEIFKHIADKRKQGANITFTWLDIKNPDYCRDARSVCSINALRDLARKYLEPAGVR  
VLYGFYKTVGGPAWKTITADLRDGEAVALS GPAQDVLNDFARSENKILTKQKIADYG  
YYNINQGFNCYGTWNRTCDQLRKSSEARDQGKLGKTFGWTIATGQDARVNDLLGK  
ANVDGLIFGFKITHFYRHADTENSFKAIKRWVDKHSATHHLATVADNPWEAAAKEA  
AAKEAAAKEPADLSQAPLKASPGHADKVGVTTCDAKPIFFGYRTWRDKAIQLK  
DDPWKDKLQVKLTDIPEHVN MVSLFHVEDNQKSDQFWETFRKEYQPCLKERGTRV  
VRTVGAQLLNKIKEKGLYGRSVEDDYKYREIARDIYKKYVTDHNLAGLAVDMALR  
KVEKRIDLQWQLRKIMGAFSELMGPKAPANEGKKPGHEGYKYLIYDTFDNAQTSQV  
GLVADLV DYVLAQTYDKGTESIDQVWNGFRDKINSCQFMAGYAQPEENDTNRFLT  
AVGEVNKSGAMQVAEWKPDNGVKGGTFA YALDRDGRTYDGDDFTLKP TDFATK  
RAIELTTGESSTDLGKATGSRGHHHHHH

---

**Table S2. Ratio between positive and negative ELISA optical density results.** Serum samples from naturally infected or negative sheep and goats were tested in different dilutions in an immunoenzymatic assay, using the MBP:PLD:CP40 protein as antigen and in different concentrations. The results are expressed as means of three independent experiments.

| Species | Antigen concentration<br>( $\mu\text{g/mL}$ ) | Serum pool dilution |       |       |       |
|---------|-----------------------------------------------|---------------------|-------|-------|-------|
|         |                                               | 1:100               | 1:200 | 1:400 | 1:800 |
| Sheep   | 1                                             | 3.25                | 3.35  | 3.36  | 4.02  |
|         | 2                                             | 3.23                | 3.97  | 4.08  | 1.98  |
|         | 4                                             | 2.43                | 3.68  | 3.17  | 1.45  |
|         | 8                                             | 2.04                | 2.17  | 2.80  | 3.25  |
| Goat    | 1                                             | 2.48                | 2.33  | 3.16  | 2.86  |
|         | 2                                             | 3.49                | 2.81  | 3.61  | 4.04  |
|         | 4                                             | 2.50                | 4.29  | 2.68  | 1.98  |
|         | 8                                             | 2.05                | 3.69  | 2.95  | 2.05  |

**Table S3. The percentage of protein secondary structure fractions of the MBP:PLD:CP40 fusion protein through UV-CD experiments.** Deconvolution and calculation of secondary structure percentages were performed by the CONTINLL software of the CDPro software package using the SP43 protein reference set. RMSD - root mean square deviation; NRMSD - normalized root-mean-square deviation.

| <b>Structure</b> | <b><math>\alpha</math>-helix</b> | <b><math>\beta</math>-sheet</b> | <b>Turn</b> | <b>RMSD</b> | <b>NRMSD</b> |
|------------------|----------------------------------|---------------------------------|-------------|-------------|--------------|
| <b>%</b>         | 19.6                             | 30.4                            | 20.8        | 0.016       | 0.016        |

**Figure S1. 3D structure of the MBP:PLD:CP40 fusion protein.** The structure in three dimensions was represented using the Chimera software. MBP is shown in grey, TEV protease site in red, PLD in green, the rigid linker in pink and CP40 in blue.

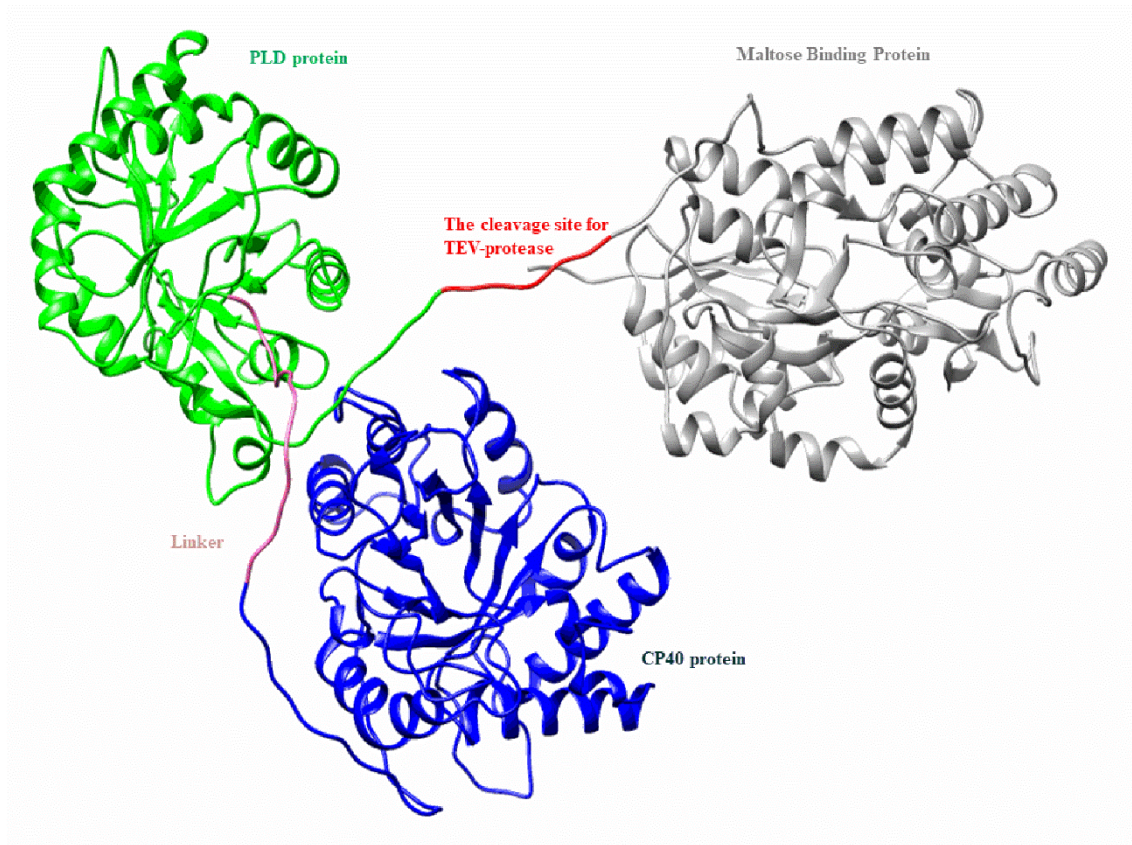

**Figure S2. Analysis of the secondary structure of the proposed model for MBP:PLD:CP40 fusion protein using RaptorX software. The structure has 33% alpha-Helix, 16% beta-sheet and 50% coil.**

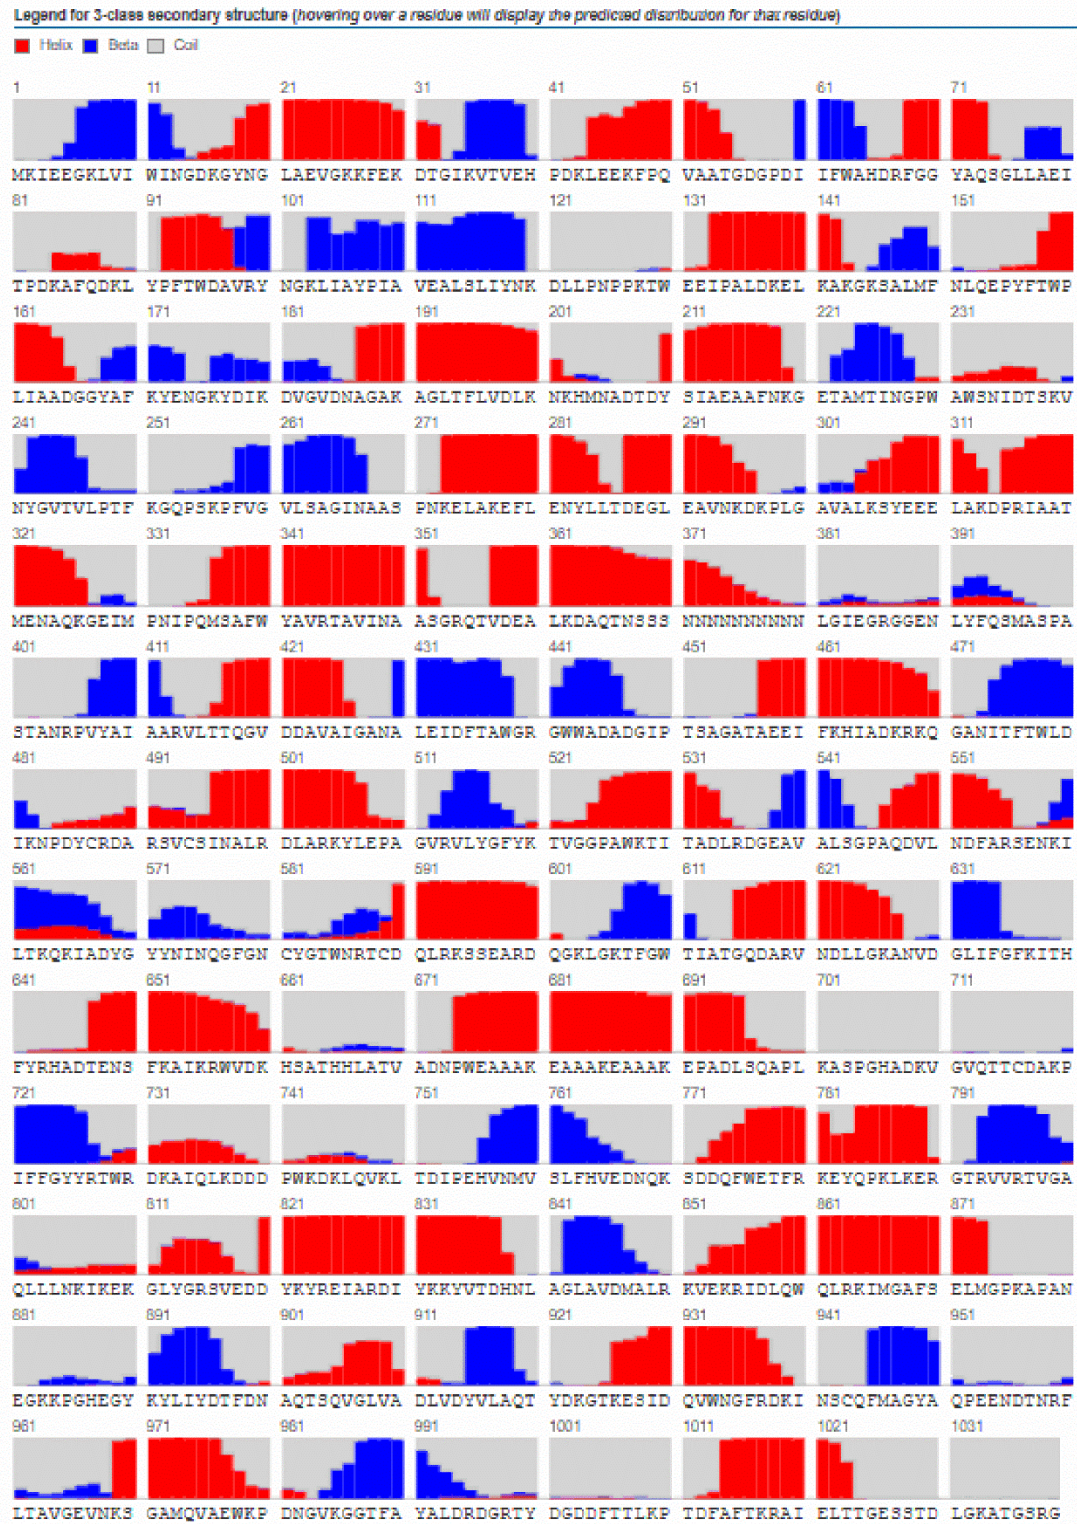

**Figure S3. Ramachandran graph generated on the SAVE PROCHECK server for the analysis of the quality of the 3D structure of the MBP:PLD:CP40 fusion protein.**

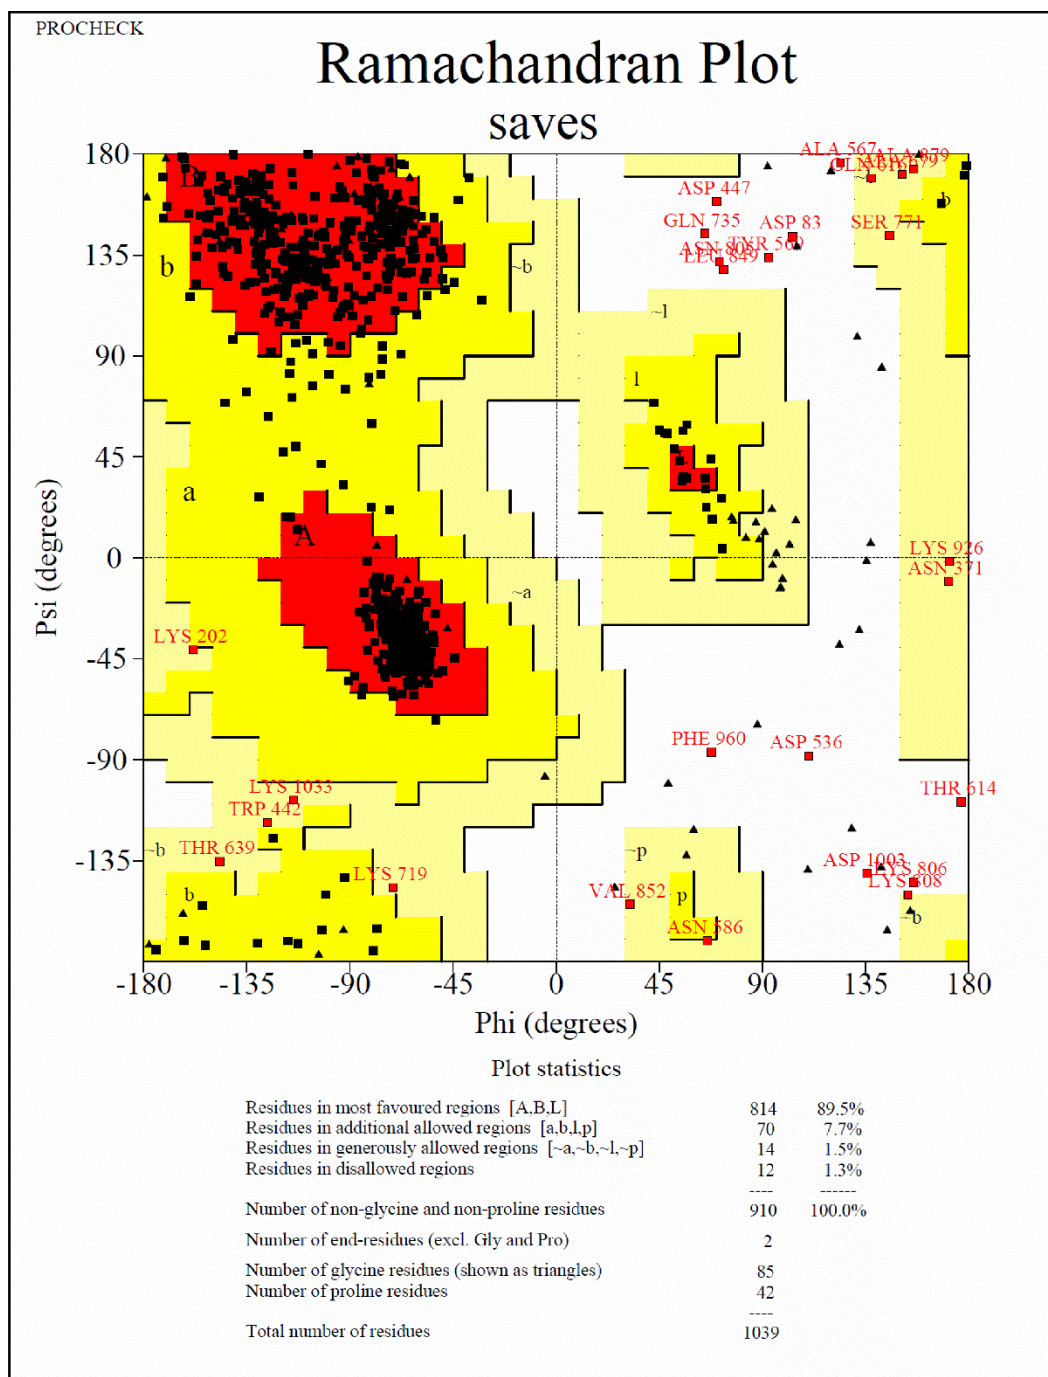

Figure S4. Graphical plot of the DLS analysis of the fusion protein. 10 cycles of 30s were used at a constant temperature of 25 °C.

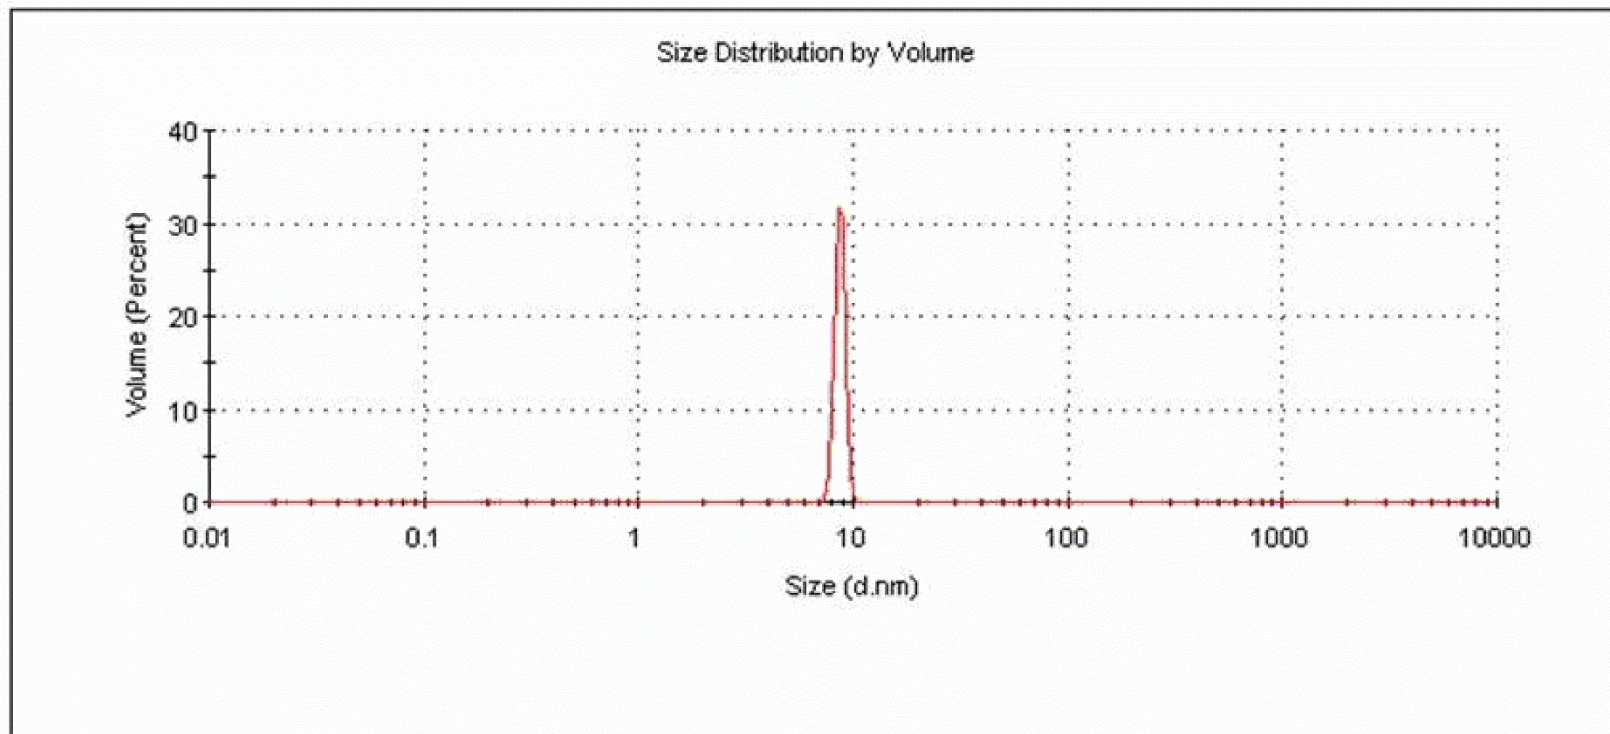



**Figure S5. Characteristic CD-UV spectrum of the MBP:PLD:CP40 fusion protein, at 25°C in 20 Mm Tris and 100 mM NaCl (pH 7.4).** The y-axis of the graph corresponds to the molar ellipticity at 103 deg.cm<sup>2</sup>.dmol<sup>-1</sup>, correlated with the progression of the wavelength, in nanometers.

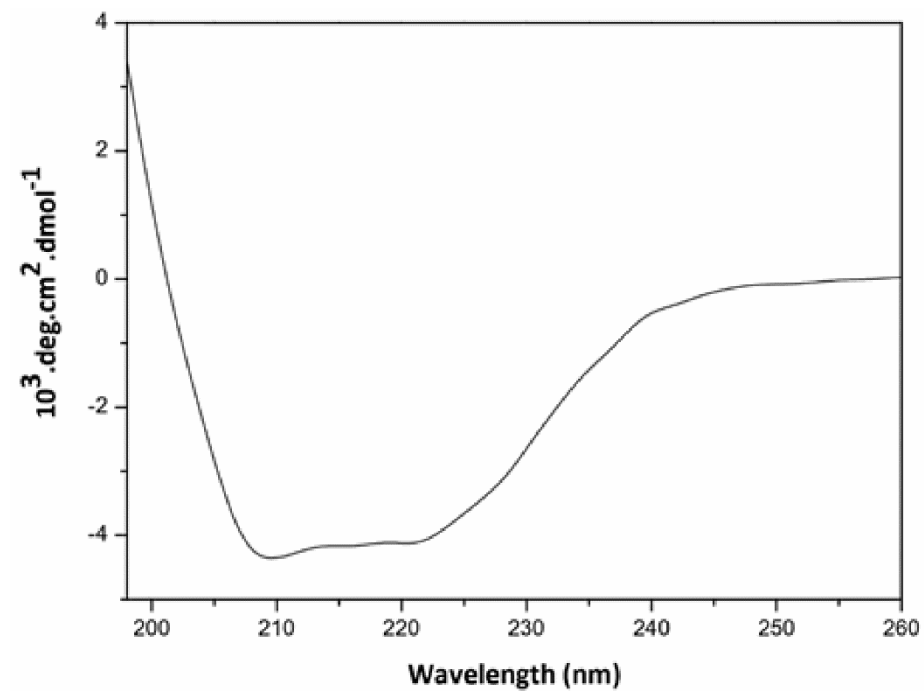

Supplement: 253_2022_12279_MOESM1_ESM.pdf [file 253_2022_12279_MOESM1_ESM.pdf]
